# Supplementary material for: Synthesis of poly(m-phenylenediamine)/iron oxide/acid oxidized multi-wall carbon nanotubes for removal of hexavalent chromium
Source: Royal Society of Chemistry journal article supplement (doi:10.1039/c4ra10282g), 2014-11-28
Supplement: c4ra10282g1.pdf [file c4ra10282g1.pdf]

## **Supplementary Material**

### **Characterization of materials, adsorption isotherms, kinetics**

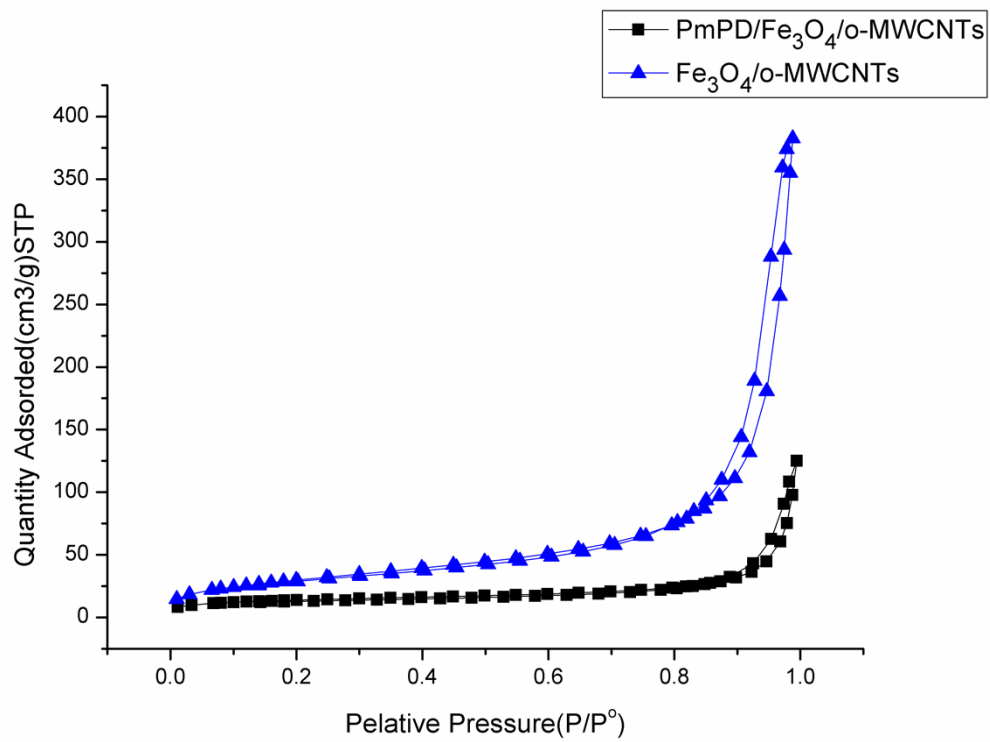

**Fig. S1.** BET measurements for Fe<sub>3</sub>O<sub>4</sub>/o-MWCNTs and PmPD/Fe<sub>3</sub>O<sub>4</sub>/o-MWCNTs.

## 2. Adsorption Isotherms

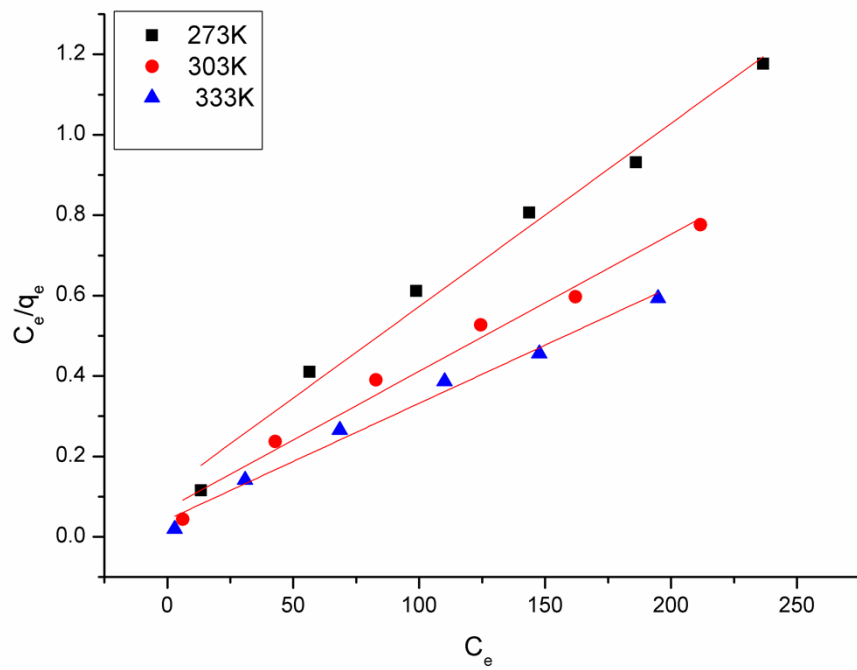

**Fig. S2.** Langmuir adsorption isotherm plots for chromium adsorption onto PmPD/Fe<sub>3</sub>O<sub>4</sub>/o-MWCNTs at different temperatures.

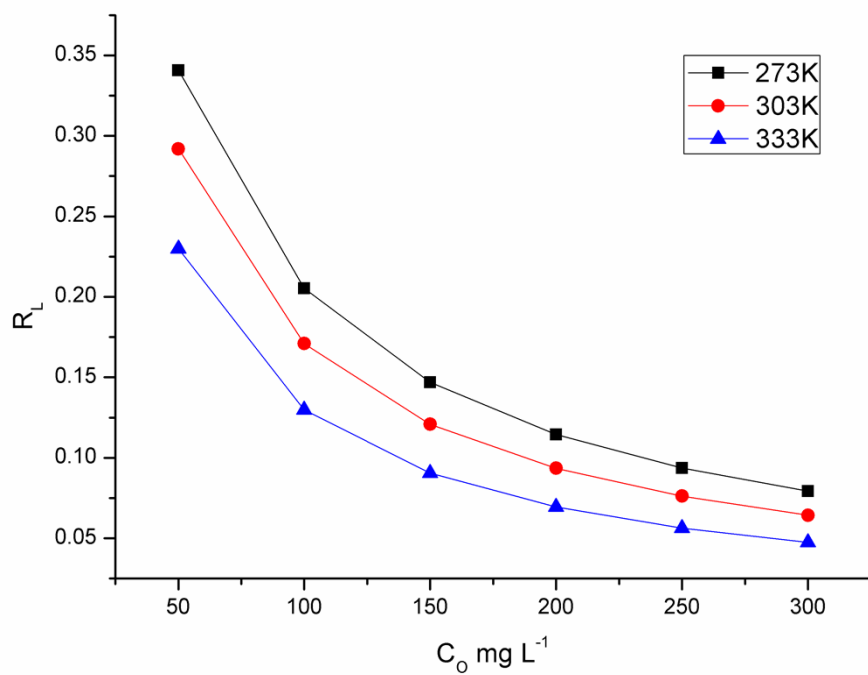

**Fig. S3.** Separation factor of chromium ions adsorbed onto PmPD/ $\text{Fe}_3\text{O}_4$ /o-MWCNTs at different temperatures.

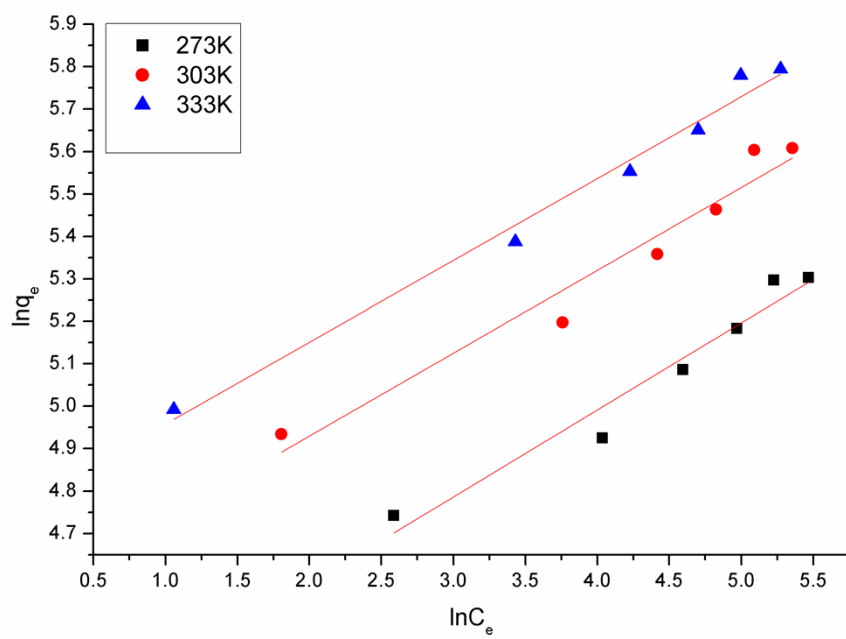

**Fig. S4.** Freundlich adsorption isotherm plots for chromium adsorption onto PmPD/Fe<sub>3</sub>O<sub>4</sub>/o-MWCNTs at different temperatures.

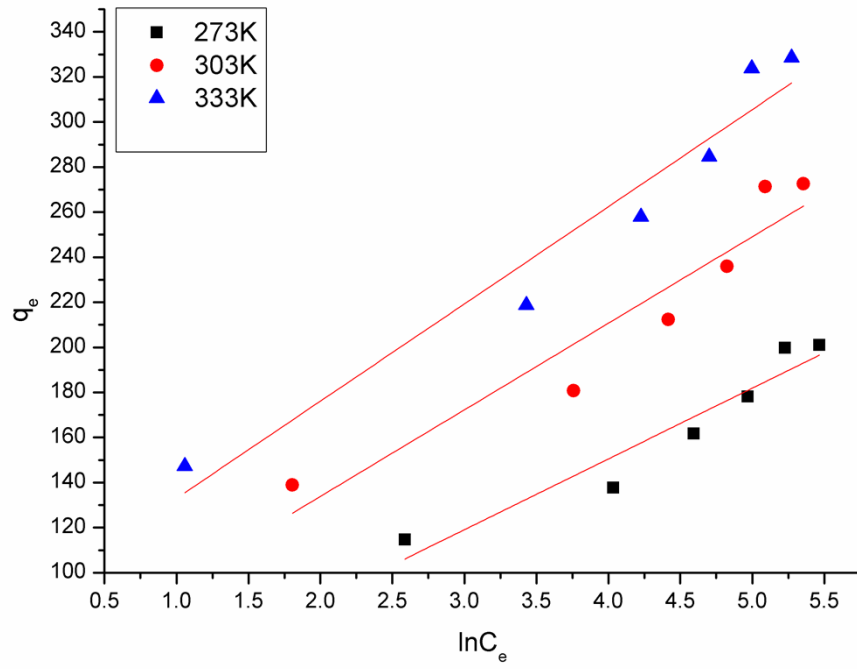

**Fig. S5.** Temkin adsorption isotherm plots for chromium adsorption onto PmPD/Fe<sub>3</sub>O<sub>4</sub>/o-MWCNTs at different temperatures.

### 3. Adsorption Kinetics

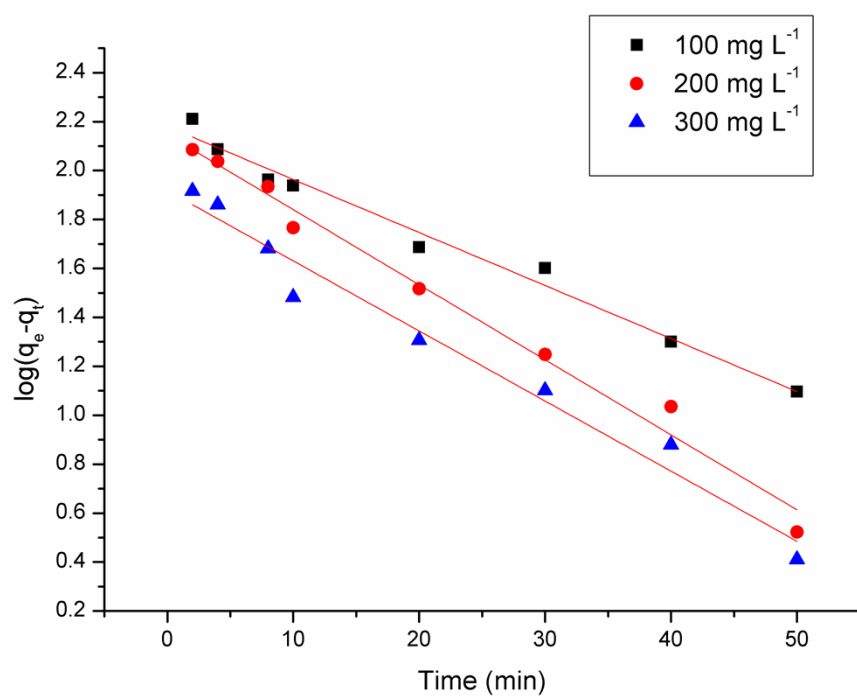

**Fig. S6.** Plot of the pseudo-first-order kinetic model for chromium on PmPD/Fe<sub>3</sub>O<sub>4</sub>/o-MWCNTs at different initial solution concentrations.

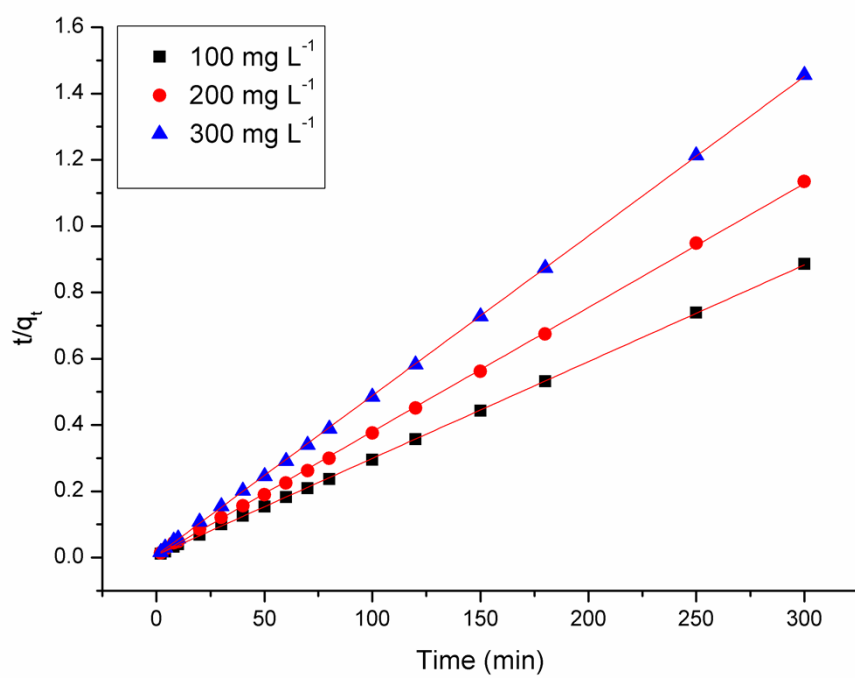

**Fig. S7.** Plot of the pseudo-second-order kinetic model for chromium on PmPD/Fe<sub>3</sub>O<sub>4</sub>/o-MWCNTs at different initial solution concentrations.
